# Supplementary material for: Differential impact of plant-based selenium nanoparticles on physio-biochemical properties, antioxidant defense system and protein regulation in fruits of huanglongbing-infected ‘Kinnow’ mandarin plants
Source: PubMed Central journal article supplement (PMC11578725; doi:10.3389/fpls.2024.1476497), 2024-11-07
Supplement: DataSheet1.pdf [file DataSheet1.pdf]

Supplementary data table T0 and T1 (seeds)

| Proteins   | Species name             | GOMF name (gene ontology molecular function) | GOBP name (gene ontology biological function) | Normalized Average of (T0) | Normalized Average of (T1) | Ratio    | <0.05    |
|------------|--------------------------|----------------------------------------------|-----------------------------------------------|----------------------------|----------------------------|----------|----------|
| A0A067CZL7 | <i>Citrus sinensis</i>   | RNA binding                                  | Translation                                   | 674.898671                 | 410.4747338                | 0.608202 | 0.032847 |
| V4SY93     | <i>Citrus clementina</i> | Allene-oxide-cyclase activity                | Jasmonic acid metabolism                      | 76.19370993                | 429.4119554                | 5.635793 | 0.025759 |
| V4S392     | <i>Citrus clementina</i> | Acetyl CoA ligase activity                   | Lipid metabolism                              | 3602.583861                | 542.7480342                | 0.150655 | 0.006622 |
| V4U519     | <i>Citrus clementina</i> | Transcription                                | Inflorescence development                     | 1362.121155                | 488.6021059                | 0.358707 | 0.024214 |
| V4SVQ9     | <i>Citrus clementina</i> | Unfolded protein binding                     | Response to stress                            | 316.6874318                | 40.24471212                | 0.12708  | 0.010461 |
| A0A067DQM9 | <i>Citrus sinensis</i>   | Glutathione transferase activity             | Response to chemicals                         | 1703.384608                | 1026.054007                | 0.602362 | 0.01354  |
| V4U7H5     | <i>Citrus clementina</i> | Aminopeptidase activity                      | Proteolysis                                   | 2709.826386                | 735.7516295                | 0.271512 | 0.004021 |
| V4UM01     | <i>Citrus clementina</i> | Phosphatidylcholine binding                  | Respond to abiotic stress                     | 1081.372009                | 505.3433738                | 0.467317 | 0.001597 |
| V4TQ66     | <i>Citrus clementina</i> | L-malate dehydrogenase activity              | Malate metabolic process                      | 157.8588631                | 337.6395903                | 2.13887  | 0.020479 |
| A0A067ERC6 | <i>Citrus sinensis</i>   | Fatty acid synthase activity                 | Embryo development ending in seed dormancy    | 387.5954007                | 129.7744079                | 0.334819 | 0.012319 |
| V4V1N5     | <i>Citrus clementina</i> | Peptidase activity                           | Proteolysis                                   | 776.0942697                | 122.3250372                | 0.157616 | 0.025581 |
| A0A067FF32 | <i>Citrus sinensis</i>   | Aspartic-type endopeptidase activity         | Proteolysis                                   | 505.2683114                | 247.5664137                | 0.48997  | 0.024397 |
| V4S535     | <i>Citrus clementina</i> | Peptidase activity                           | Stamen formation                              | 590.5157419                | 375.7515816                | 0.636311 | 0.007624 |
| V4TVB1     | <i>Citrus clementina</i> | NAD binding                                  | Pyruvate metabolic process                    | 190.2177143                | 26.61051877                | 0.139895 | 0.003543 |
| A0A067FH27 | <i>Citrus sinensis</i>   | Serine-type endopeptidase activity           | Proteolysis                                   | 817.7040915                | 1673.956752                | 2.047142 | 0.02876  |
| A0A067FI88 | <i>Citrus sinensis</i>   | Peroxidase activity                          | Response to oxidative stress                  | 906.1508578                | 557.8661977                | 0.615644 | 0.021346 |
| V4TS21     | <i>Citrus clementina</i> | Threonine-type endopeptidase activity        | Response to zinc ion                          | 745.3566089                | 222.393205                 | 0.298372 | 0.034178 |
| X2J355     | <i>Citrus sinensis</i>   | Cysteine-type peptidase activity             | Proteolysis                                   | 454.9558064                | 1944.133634                | 4.273236 | 0.01476  |
| A0A067GH18 | <i>Citrus sinensis</i>   | uncharacterized                              | Uncharacterized                               | 1703.167693                | 666.1498671                | 0.391124 | 0.018759 |
| A0A067GNU4 | <i>Citrus sinensis</i>   | GTPase activity                              | Protein transport                             | 390.4167473                | 75.7169092                 | 0.193939 | 0.012215 |
| V4TE12     | <i>Citrus clementina</i> | uncharacterized                              | Uncharacterized                               | 173.4353781                | 21.39372255                | 0.123353 | 0.017187 |
| A0A067H9U2 | <i>Citrus sinensis</i>   | Glucose -6-phosphate isomerase activity      | Gluconeogenesis                               | 291.5991414                | 61.04391212                | 0.209342 | 0.047286 |
| A0A067GYQ8 | <i>Citrus sinensis</i>   | Protein disulfide isomerase activity         | Respond to endoplasmic reticulum stress       | 3691.447463                | 1974.004265                | 0.534751 | 0.042239 |
| A0A067H0C3 | <i>Citrus sinensis</i>   | phosphoprotein phosphatase                   | Inflorescence development                     | 162.7231602                | 40.94912623                | 0.251649 | 0.014853 |
| A0A1S8ACJ4 | <i>Citrus lemon</i>      | ATP dependent protein folding chaperon       | Protein refolding                             | 1100.287118                | 191.5143884                | 0.174059 | 0.012024 |

|            |                          |                                            |                                  |             |             |          |          |
|------------|--------------------------|--------------------------------------------|----------------------------------|-------------|-------------|----------|----------|
| V4WGV2     | <i>Citrus clementina</i> | ATP hydrolysis activity                    | Protein folding                  | 1153.021142 | 467.9150962 | 0.405817 | 0.044779 |
| Q39629     | <i>Citrus sinensis</i>   | Acetyl CoA ligase activity                 | Reproduction                     | 4131.578122 | 484.1529696 | 0.117184 | 0.028555 |
| V4RJK9     | <i>Citrus clementina</i> | Adenosylhomocysteinase activity            | Carbon metabolism                | 1264.228029 | 295.143958  | 0.233458 | 0.019658 |
| V4RMN0     | <i>Citrus clementina</i> | Acireductone synthase activity             | Proline metabolism               | 6970.880432 | 17574.8086  | 2.521175 | 0.026742 |
| V4RNH3     | <i>Citrus clementina</i> | ATP-dependent protein folding<br>chaperone | Response to stress               | 662.3027895 | 166.1530355 | 0.250872 | 0.032308 |
| V4S7V0     | <i>Citrus clementina</i> | uncharacterized                            | Uncharacterized                  | 317.4810637 | 67.07950336 | 0.211287 | 0.02327  |
| V4SGH6     | <i>Citrus clementina</i> | Calcium ion binding                        | Protein folding                  | 438.8366028 | 94.48341543 | 0.215304 | 0.019956 |
| V4SJT5     | <i>Citrus clementina</i> | ATP dependent protein folding chaperon     | Respond to stress                | 8333.119941 | 4565.407361 | 0.547863 | 0.036855 |
| V4SKG4     | <i>Citrus clementina</i> | Glucose -6-phosphate isomerase activity    | Gluconeogenesis                  | 1156.94605  | 534.7665238 | 0.462223 | 0.032278 |
| V4SMC0     | <i>Citrus clementina</i> | Catalytic activity                         | Cell wall organization           | 1612.665132 | 533.7130373 | 0.330951 | 0.006374 |
| V4SR38     | <i>Citrus clementina</i> | Actin filament binding                     | Cell wall biogenesis             | 32.10010495 | 5.945904983 | 0.18523  | 0.232827 |
| V4STL6     | <i>Citrus clementina</i> | Protein self-Association                   | Response to heat                 | 1209.406474 | 356.3578128 | 0.294655 | 0.001179 |
| V4SXD5     | <i>Citrus clementina</i> | Hydrolase activity                         | Cell organization                | 806.4510684 | 362.8179169 | 0.449895 | 0.005862 |
| V4SZI9     | <i>Citrus clementina</i> | Metalloendopeptidase activity              | Mitochondrial transport          | 273.2684224 | 65.32676063 | 0.239057 | 0.012516 |
| V4T992     | <i>Citrus clementina</i> | Transaminase activity                      | Peptide catabolic process        | 53.80485791 | 276.8834309 | 5.146068 | 0.009143 |
| V4TAG2     | <i>Citrus clementina</i> | Glutamate 5-Kinase activity                | Proline biosynthesis             | 96.68753501 | 288.8227592 | 2.987177 | 0.004148 |
| V4TKF6     | <i>Citrus clementina</i> | Super oxide dismutase activity             | Protection                       | 783.2077763 | 73.66237122 | 0.094052 | 0.001126 |
| V4THB5     | <i>Citrus clementina</i> | Oxidoreductase activity                    | Cell redox homeostasis           | 430.3850604 | 50.83830083 | 0.118123 | 0.001336 |
| V4TNQ8     | <i>Citrus clementina</i> | Carbon-carbon lyase activity               | Gluconeogenesis                  | 362.942687  | 88.95401848 | 0.245091 | 0.010342 |
| V4TRS7     | <i>Citrus clementina</i> | NADP binding                               | Glucose metabolism               | 286.6413885 | 148.5048463 | 0.518086 | 0.030488 |
| V4TX11     | <i>Citrus clementina</i> | Protein self-association                   | Transcription                    | 285.0084396 | 149.12976   | 0.523247 | 0.038801 |
| V4TZU5     | <i>Citrus clementina</i> | Oxidoreductase activity                    | Glycolytic process               | 591.7676406 | 229.2730033 | 0.387438 | 0.005414 |
| V4UGU0     | <i>Citrus clementina</i> | Chitinase activity                         | Carbohydrate metabolism          | 540.6284962 | 260.0123611 | 0.480945 | 0.031902 |
| V4UHG4     | <i>Citrus clementina</i> | uncharacterized                            | uncharacterized                  | 1871.141323 | 752.3450769 | 0.402078 | 0.020648 |
| V4UI07     | <i>Citrus clementina</i> | Structural constituents of ribosomes       | Translation                      | 352.969473  | 65.63580892 | 0.185953 | 0.007055 |
| V4UJ63     | <i>Citrus clementina</i> | Uncharacterized                            | Uncharacterized                  | 240.0993901 | 38.21075243 | 0.159146 | 0.027232 |
| V4UJF9     | <i>Citrus clementina</i> | Oxidoreductase activity                    | Primary metabolic process        | 785.295022  | 4586.545313 | 5.840538 | 0.04422  |
| V4W9L3     | <i>Citrus clementina</i> | Hydrolase activity                         | Small molecule catabolic process | 440.854721  | 1467.153511 | 3.327975 | 0.043453 |
| V4S392     | <i>Citrus clementina</i> | Acetyl CoA ligase activity                 | Reproduction                     | 3602.583861 | 946.9844729 | 0.262863 | 0.016324 |
| A0A067DC44 | <i>Citrus sinensis</i>   | hydrolase activity                         | cell wall organization           | 187.127645  | 112.3265768 | 0.600267 | 0.025142 |

T0 and T5 (Seeds)

| Proteins      | Species name             | GOMF name (gene ontology<br>molecular function) | GOBP name (gene ontology<br>biological function) | Normalized<br>Average of T0 | Normalized<br>Average of T5 | Ratio       | P<0.05      |
|---------------|--------------------------|-------------------------------------------------|--------------------------------------------------|-----------------------------|-----------------------------|-------------|-------------|
| A0A067D3A9    | <i>Citrus sinensis</i>   | Uncharacterized protein                         | Uncharacterized protein                          | 566.6918133                 | 244.7446391                 | 0.431883139 | 0.010164215 |
| V4S392        | <i>Citrus clementina</i> | Fatty acid synthase activity                    | Lipid biosynthetic process                       | 917.2934438                 | 3602.583861                 | 3.927406094 | 0.015278158 |
| A0A067EBT2    | <i>Citrus sinensis</i>   | Translation elongation factor activity          | Protein biosynthesis                             | 1049.3061                   | 1789.248414                 | 1.705172985 | 0.03683252  |
| A0A067ECI6    | <i>Citrus sinensis</i>   | Uncharacterized protein                         | Uncharacterized protein                          | 70.66606868                 | 12.11843817                 | 0.171488784 | 0.020708577 |
| V4TQ66        | <i>Citrus clementina</i> | L-malate dehydrogenase activity                 | Malate metabolic process                         | 337.6395903                 | 177.9702549                 | 0.527101264 | 0.049276154 |
| V4V1N5        | <i>Citrus clementina</i> | Aspartic-type endopeptidase activity            | Proteolysis                                      | 776.0942697                 | 243.95394                   | 0.314335448 | 0.020468769 |
| A0A067FI88    | <i>Citrus sinensis</i>   | Peroxidase activity                             | Response to oxidative stress                     | 520.9812026                 | 906.1508578                 | 1.73931584  | 0.016405294 |
| V4T6T5        | <i>Citrus clementina</i> | RNA binding                                     | Translation                                      | 130.4054285                 | 281.5694223                 | 2.159184825 | 0.034020461 |
| X2J355        | <i>Citrus sinensis</i>   | Cysteine type-endopeptidase activity            | Proteolysis                                      | 1944.133634                 | 920.5473452                 | 0.473500036 | 0.045394726 |
| V4VJX2        | <i>Citrus clementina</i> | RNA binding                                     | rRNA processing                                  | 141.0853061                 | 206.5406148                 | 1.46394136  | 0.044220659 |
| A0A067G7D1    | <i>Citrus sinensis</i>   | Pectin esterase activity                        | Cell wall modification                           | 120.1962861                 | 306.0742074                 | 2.546453116 | 0.017602217 |
| Q948T8        | <i>Citrus jambhiri</i>   | DNA binding                                     | Structural constituents of chromatin             | 437.5522582                 | 242.1050559                 | 0.553316893 | 0.0019717   |
| A0A067GGT9    | <i>Citrus sinensis</i>   | Uncharacterized protein                         | Uncharacterized protein                          | 1586.13639                  | 906.9719654                 | 0.571812091 | 0.047258074 |
| A0A067GNU4    | <i>Citrus sinensis</i>   | GTPase activity                                 | Transport                                        | 148.4048687                 | 390.4167473                 | 2.630754307 | 0.001409839 |
| tr A0A1S8ACJ4 | <i>Citrus limon</i>      | ATP binding                                     | Protein refolding                                | 1100.287118                 | 489.0628759                 | 0.444486596 | 0.010276047 |
| Q39629        | <i>Citrus sinensis</i>   | acyl-CoA ligase activity                        | Lipid metabolism                                 | 994.0126189                 | 1131.578122                 | 1.138394122 | 0.036386614 |
| V4RJK9        | <i>Citrus clementina</i> | Adenosylhomocysteinase activity                 | Carbon metabolism                                | 1264.228029                 | 628.0658357                 | 0.496797905 | 0.032276137 |
| V4SQX0        | <i>Citrus clementina</i> | Uncharacterized protein                         | Uncharacterized protein                          | 600.2018385                 | 103.1634897                 | 0.171881329 | 0.029614637 |
| V4T939        | <i>Citrus clementina</i> | Serine-type carboxypeptidase activity           | proteolysis                                      | 840.9145816                 | 595.436932                  | 0.708082539 | 0.022837573 |
| V4TAG2        | <i>Citrus clementina</i> | Uncharacterized protein                         | Uncharacterized protein                          | 288.8227592                 | 88.90763484                 | 0.307827663 | 0.045871708 |
| V4UGU0        | <i>Citrus clementina</i> | Chitinase activity                              | chitin metabolism                                | 540.6284962                 | 305.5521285                 | 0.565179473 | 0.041755099 |
| V4VPK9        | <i>Citrus clementina</i> | Uncharacterized protein                         | Uncharacterized protein                          | 119.848813                  | 68.22415967                 | 0.56925186  | 0.025141813 |
| V4WEE3        | <i>Citrus clementina</i> | RNA binding                                     | translation                                      | 89.1253435                  | 177.128318                  | 1.987406848 | 0.025141813 |
| tr V4SRE5     | <i>citrus clementina</i> | dihydroneopterin aldolase activity              | Folic acid metabolism                            | 761.123675                  | 970.325435                  | 1.274859089 | 0.025141813 |
| V4W5U2        | <i>citrus clementina</i> | Phosphoglucomutase activity                     | glucose metabolic processes                      | 680.135676                  | 876.986787                  | 1.28942918  | 0.025141813 |
| V4WDK0        | <i>citrus clementina</i> | Metalloendopeptidase activity                   | Proteolysis                                      | 970.1343265                 | 1143.185645                 | 1.178378719 | 0.025141813 |

|            |                          |                                       |                                |             |             |             |             |
|------------|--------------------------|---------------------------------------|--------------------------------|-------------|-------------|-------------|-------------|
| V4TJQ9     | Citrus clementina        | Hsp90 protein binding                 | Protein folding                | 1188.965896 | 237.2742099 | 0.199563512 | 0.056760823 |
| A0A8A4JGR3 | Citrus clementina        | ATP binding                           | Transport                      | 153.1059813 | 32.25354241 | 0.210661544 | 0.045382347 |
| V4SY93     | Citrus clementina        | Allene-oxide cyclase activity         | Jasmonic acid biosynthesis     | 429.4119554 | 687.5754602 | 1.601202415 | 0.057441124 |
| V4RVN7     | Citrus clementina        | Metal ion binding                     | Response to water deprivation  | 1286.001184 | 8239.829923 | 6.407326858 | 0.03120685  |
| A0A067DQM9 | Citrus sinensis          | Glutathione transferase activity      | Translation and detoxification | 1703.384608 | 3467.206316 | 2.035480595 | 0.010029585 |
| A0A067ERS2 | Citrus sinensis          | Calcium Ion binding                   | Response to stress             | 311.3414301 | 527.9223192 | 1.695637869 | 0.014823472 |
| V4V1N5     | Citrus clementina        | Aspartic -type endopeptidase activity | Proteolysis                    | 776.0942697 | 244.0889406 | 0.314509397 | 0.035885506 |
| V4S886     | Citrus sinensis          | structural constituents of Ribosomes  | Translation                    | 167.8603174 | 275.5708134 | 1.641667416 | 0.021506383 |
| A0A067FF32 | Citrus sinensis          | Aspartic -type endopeptidase activity | lipid metabolic process        | 505.2683114 | 817.119407  | 1.617198998 | 0.032456077 |
| V4TVB1     | Citrus sinensis          | Metal ion binding                     | Malate metabolic process       | 190.2177143 | 61.64387839 | 0.324070125 | 0.010528528 |
| A0A067FI92 | Citrus sinensis          | Peroxidase activity                   | Response to pathogen attack    | 1759.260274 | 3641.258607 | 2.069766856 | 0.032066668 |
| V4RU72     | Citrus clementina        | Pyruvate dehydrogenase activity       | Glycolytic activity            | 245.5378081 | 1386.038503 | 5.644908674 | 0.034441972 |
| A0A067H799 | Citrus sinensis          | Peroxidase activity                   | hydrogen peroxide removal      | 192.8866032 | 422.0764681 | 2.188210384 | 0.009515247 |
| V4T0S4     | Citrus clementina        | Uncharacterized protein               | Uncharacterized protein        | 185.1942727 | 1338.364839 | 7.226815489 | 0.022257865 |
| V4TBA1     | Citrus clementina        | Pyruvate dehydrogenase activity       | Unfold protein binding         | 11613.30696 | 4285.043322 | 0.368977014 | 0.010009576 |
| V4TJQ9     | Citrus clementina        | Hsp90 protein binding                 | Protein folding                | 1176.953896 | 1237.17421  | 1.051166247 | 0.056760823 |
| V4TW14     | Citrus clementina        | Protein disulfide isomerase activity  | Pollen tube development        | 227.9584737 | 517.4577907 | 2.269965149 | 0.012973509 |
| V4UBR6     | Citrus clementina        | Catalytic activity                    | Cell wall organization         | 798.4360781 | 1440.265576 | 1.803858337 | 0.03358495  |
| V4UDD5     | Citrus clementina        | Phosphoric ester hydrolase activity   | Response to stimulus           | 215.0266384 | 773.7234101 | 3.598267712 | 0.008926967 |
| V4VLH3     | Citrus clementina        | Endopeptidase activity                | Protein metabolic process      | 264.882938  | 32.05331295 | 0.121009353 | 0.02216114  |
| V4S392     | Citrus clementina        | Acetyl CoA ligase activity            | Reproduction                   | 3104.512456 | 5154.984473 | 1.660481169 | 0.016323501 |
| V4S535     | <i>Citrus clementina</i> | Peptidase activity                    | Stamen formation               | 375.7515816 | 590.5157419 | 1.571558899 | 0.007623535 |
| A0A067H0C3 | <i>Citrus sinensis</i>   | phosphoprotein phosphatase            | Inflorescence development      | 45.94912623 | 172.7231602 | 3.759008589 | 0.014852646 |
| Q39629     | <i>Citrus sinensis</i>   | Acetyl CoA ligase activity            | Reproduction                   | 384.1529696 | 1131.578122 | 2.945644604 | 0.028555157 |
| V4TKF6     | <i>Citrus clementina</i> | Superoxide dismutase activity         | Protection                     | 73.66237122 | 283.2777631 | 3.845623734 | 0.001125999 |
